# Supplementary material for: An integrative pan-cancer investigation reveals common genetic and transcriptional alterations of AMPK pathway genes as important predictors of clinical outcomes across major cancer types
Source: PubMed Central journal article supplement (PMC7433212; doi:10.1186/s12885-020-07286-2), 2020-08-17

Additional file 4

A

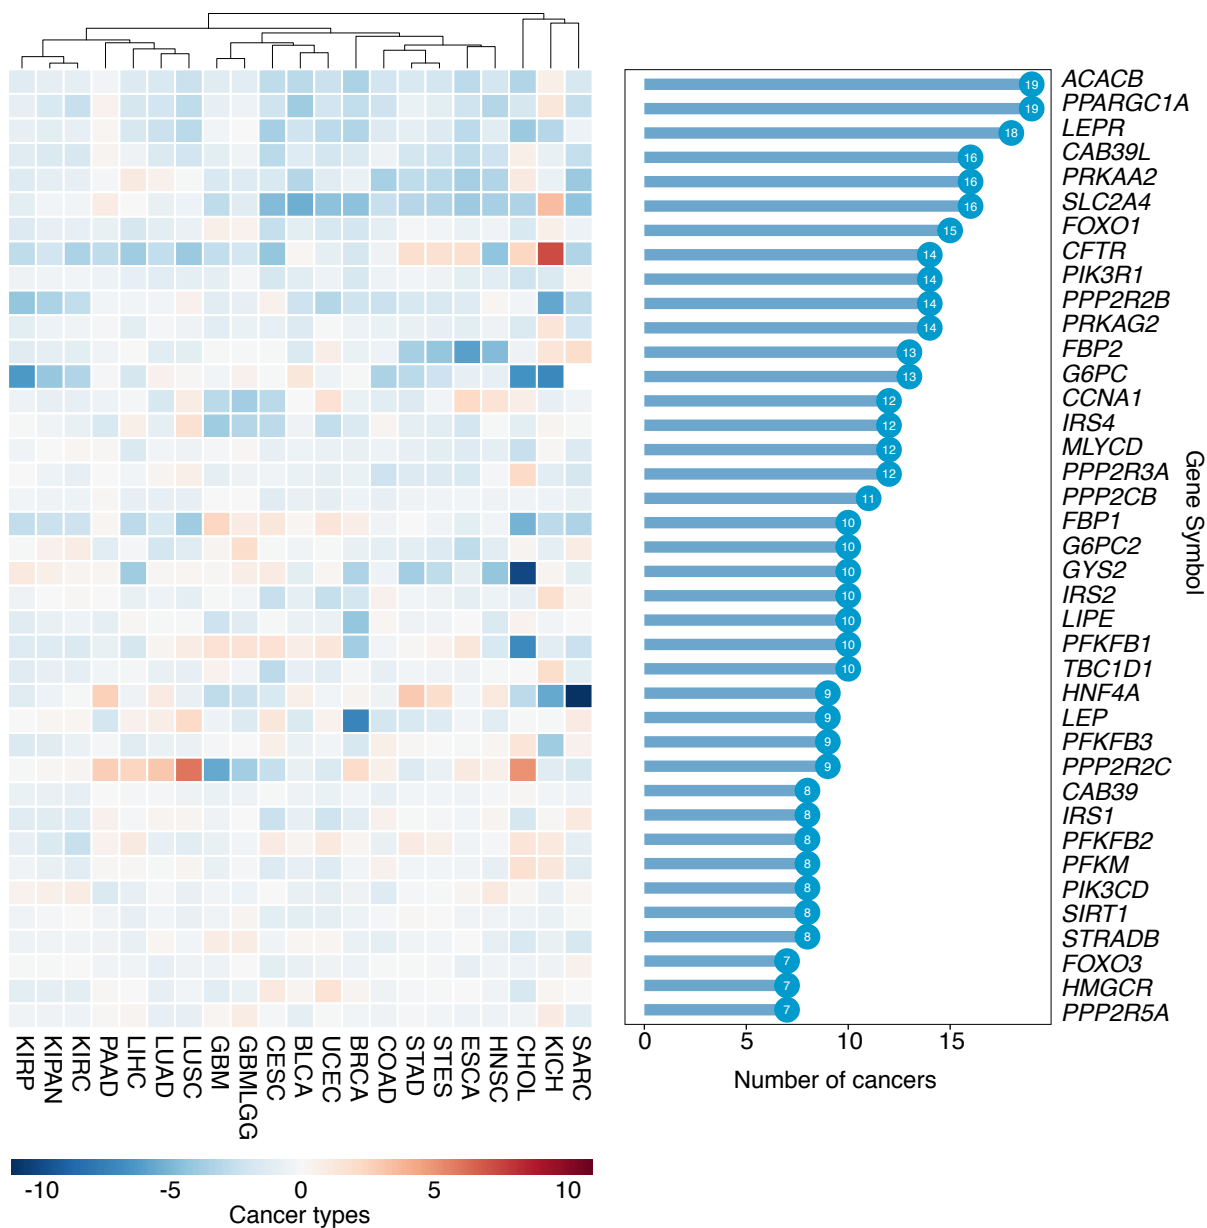

B

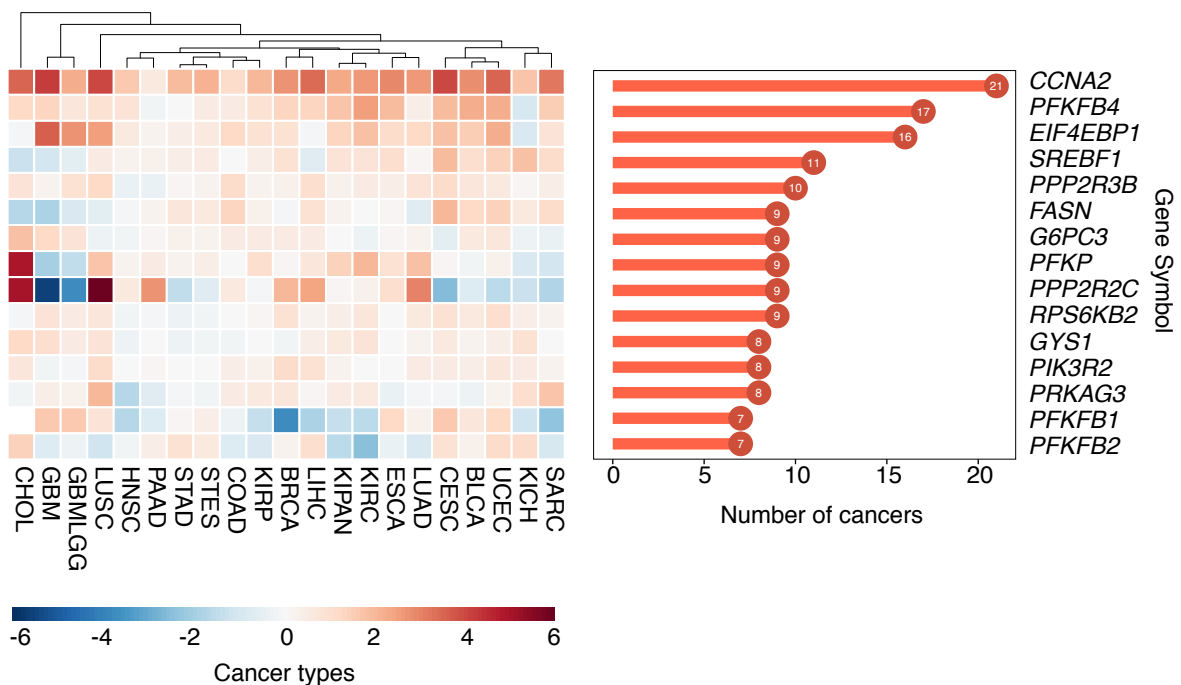

Supplement: 12885_2020_7286_MOESM4_ESM.pdf [file 12885_2020_7286_MOESM4_ESM.pdf]
